# Supplementary material for: Elevating the comprehensive performance of carbon-based hybrid electrode materials by incorporating nickel silicate for lithium-ion capacitors
Source: Royal Society of Chemistry journal article supplement (doi:10.1039/d3nj03659f), 2023-01-01
Supplement: d3nj03659f1.pdf [file d3nj03659f1.pdf]

## Supporting Information

### **Elevating the comprehensive performance of carbon-based hybrid electrode materials by incorporating nickel silicate for lithium-ion capacitors**

*Hao Chen<sup>a,b,\*†</sup>, Jiajie Wang<sup>b,†</sup>, Ziheng Guan<sup>b</sup>, Yingjie Tao<sup>b</sup>, Lanze Li<sup>b</sup>, Junjie Wei<sup>b</sup>, Fan  
Wang<sup>b,\*</sup>, Zhehong Shen<sup>b</sup>, and Deren Yang<sup>a</sup>*

<sup>a</sup> State Key Laboratory of Silicon and Advanced Semiconductor Materials and School of Materials Science and Engineering, Zhejiang University, Hangzhou 310027, People's Republic of China

<sup>b</sup> College of Chemistry and Materials Engineering, Zhejiang Provincial Collaborative Innovation Center for Bamboo Resources and High-Efficiency Utilization, National Engineering and Technology Research Center of Wood-based Resources Comprehensive Utilization, and Key Laboratory of Wood Science and Technology of Zhejiang Province, Zhejiang A&F University, Hangzhou 311300, China.

E-mail: haochen@zafu.edu.cn (H. Chen); wangf@zafu.edu.cn (F. Wang);

† These two authors contributed equally to this work.

### *1. Material Characterization*

The morphology and size of the samples were analyzed by scanning electron microscope (SEM, Hitachi, SU8010) and transmission electron microscope (TEM, JEM-2100). The content and distribution of elements were determined by energy dispersive X-ray spectrometer (EDS, TSL, AMETEK) and X-ray photoelectron spectrometer (XPS, Thermo Scientific K-Alpha,  $h\nu=1486.6$  eV). Due to the fact that EDS results are obtained simultaneously with SEM observation, the data obtained contains signals from the Au coating used for SEM observation. The crystal structure of the samples was analyzed by Raman microscopy (Raman, HORIBA Scientific LabRAM HR Evolution) and X-ray diffraction spectroscopy (XRD, Brooke D2 PHASER).

### *2. Detailed evaluation process of $\text{Li}^+$ diffusion coefficient*

For the galvanostatic intermittent titration technique (GITT) test, cells were charged and discharged at a current density of  $100 \text{ mA g}^{-1}$  for 10 min and left to stand for 30 min. The diffusion coefficient can be calculated based on  $D_{\text{Li}^+} = (4/\pi\tau) \times (m_{\text{B}}V_{\text{M}}/(M_{\text{B}}S))^2 \times (\Delta E_{\text{s}}/\Delta E_{\text{t}})^2$ , where  $D_{\text{Li}^+}$  is the  $\text{Li}^+$  diffusion coefficient ( $\text{cm}^2 \text{ s}^{-1}$ ),  $\tau$  is the duration of current pulse (10 min),  $m_{\text{B}}$  (g) and  $M_{\text{B}}$  ( $\text{g mol}^{-1}$ ) are the mass and molecular weight of the active materials in the electrode, respectively,  $V_{\text{M}}$  ( $\text{cm}^3 \text{ mol}^{-1}$ ) and  $S$  ( $\text{cm}^2$ ) are the molar volume and the total area of the electrode, respectively, and  $\Delta E_{\text{t}}$  and  $\Delta E_{\text{s}}$  are the changes in the cell voltage during the 10 min current pulse from  $\tau_0$  to  $\tau_{0+t}$  and the relaxation period of 30 min, respectively. [1, 2]

### *3. Detailed evaluation process of $\text{Li}^+$ diffusion coefficient*

According to previous literature [3], the relationship between peak current ( $i$ ) and scan rate ( $v$ ) of CV curves can be described by the following formula:  $i = av^b$  (1),  $\log(i) = \log(a) + b \log(v)$  (2), where  $a$  and  $b$  are adjustable parameters. The  $b$ -value is determined by the slope of  $\log(v)$  vs  $\log(i)$  plot, which is between 0.5 and 1. The  $b$ -value of 1 manifests that the charge storage is dominated by surface capacitance, the  $b$ -value of 0.5 represents a mass diffusion-controlled process, and the  $b$ -value between 0.5 and 1 means hybrid control [4]. Furthermore, the contribution ratio of the capacitive behavior ( $k_1v$ ) and the diffusion-controlled process ( $k_2v^{1/2}$ ) can be quantitatively calculated using CV data with reference to the following formula [4]:  $i(V) = k_1v + k_2v^{1/2}$  (3), where,  $i(V)$ ,  $k_1$ , and  $k_2$  correspond to the current value at a given voltage, the slope, and intercept of the fitted plot between  $i(V)/v^{1/2}$  and  $v^{1/2}$ , respectively.

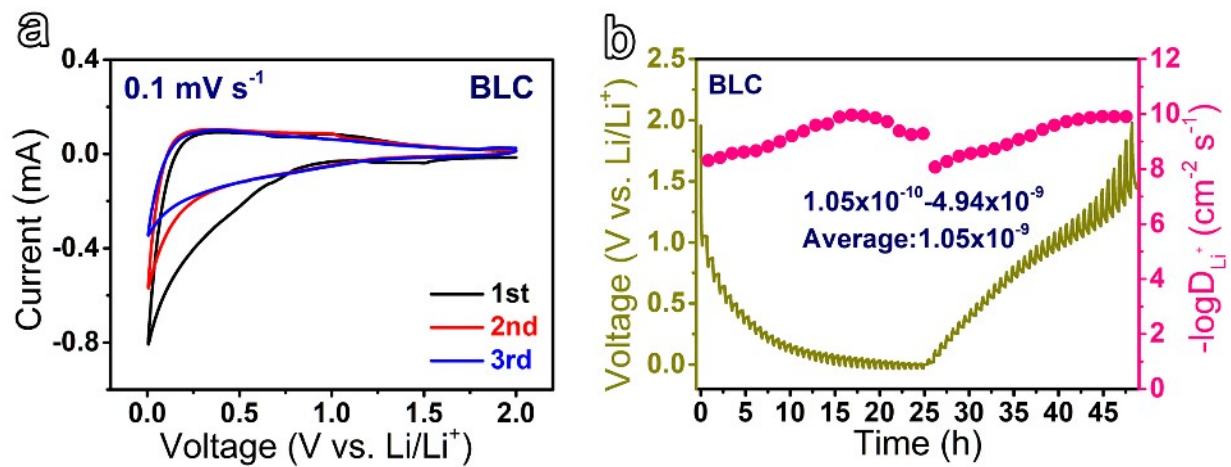

**Figure S1.** (a) CV curves at  $0.1 \text{ mV s}^{-1}$  and (b) GITT curves of BLC.

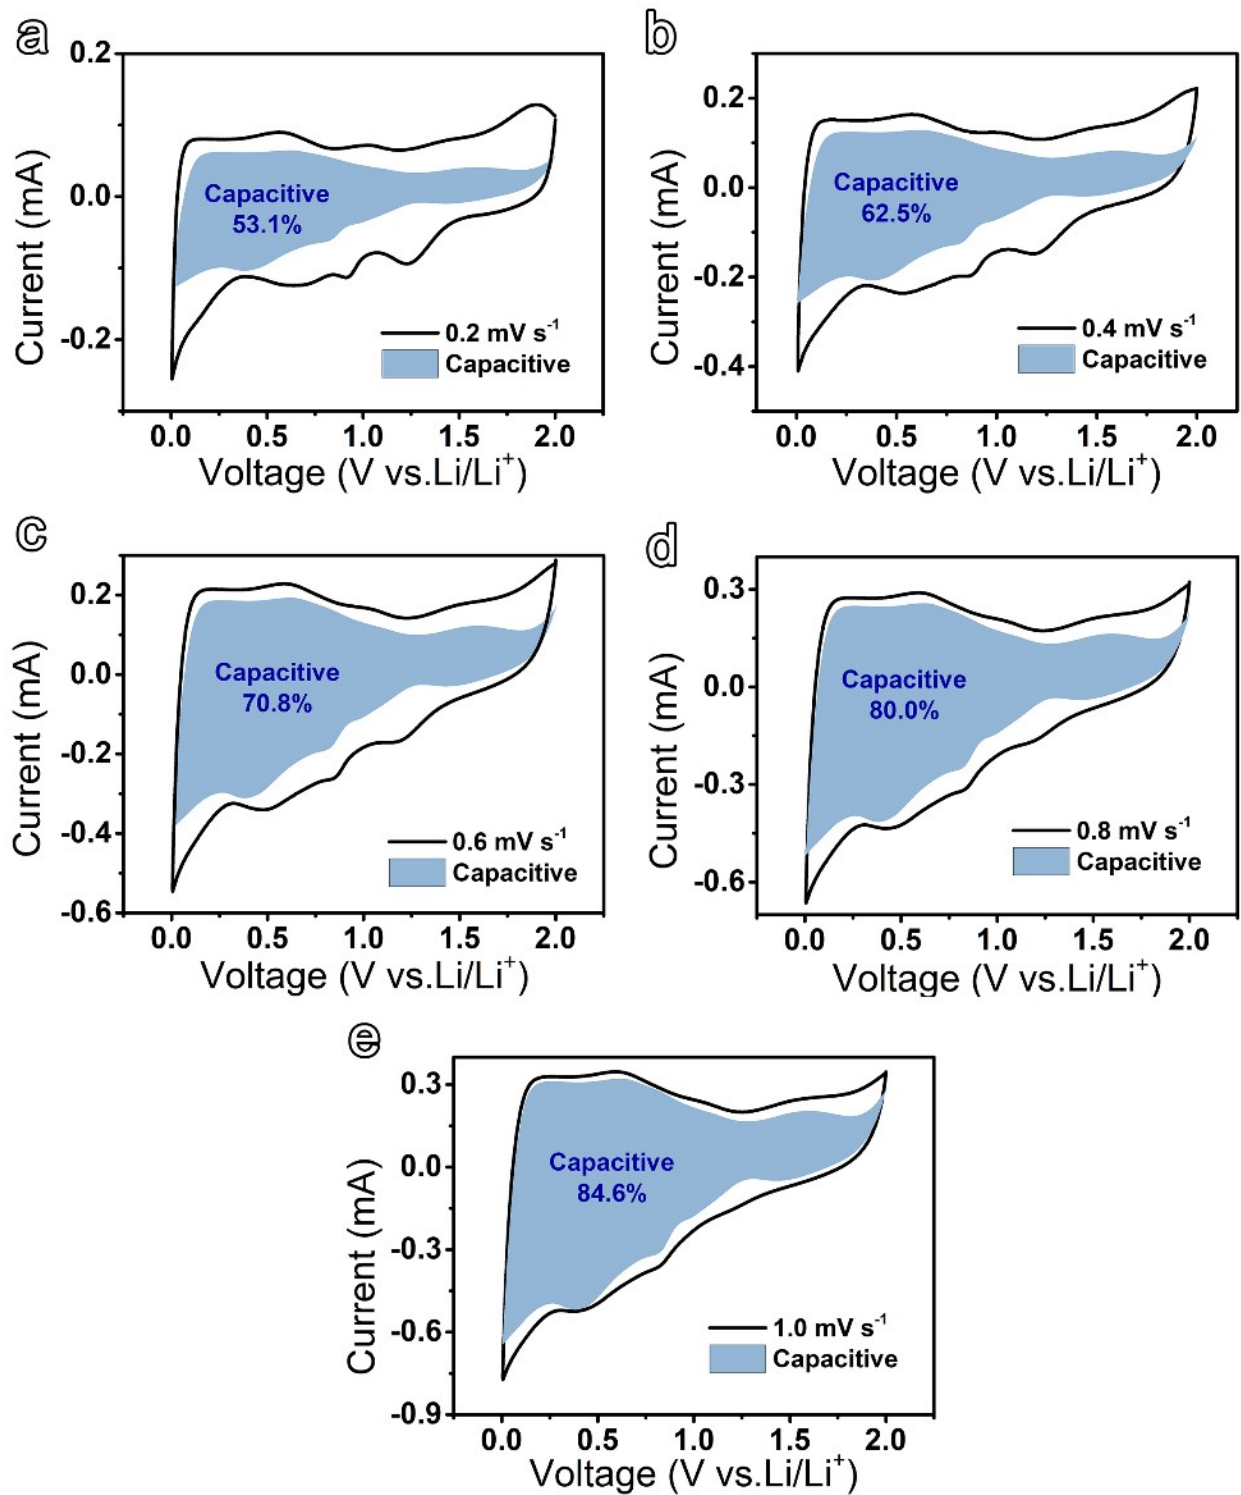

**Figure S2.** Capacitance contribution in CV curves at different scan rates of NiSiC electrode.

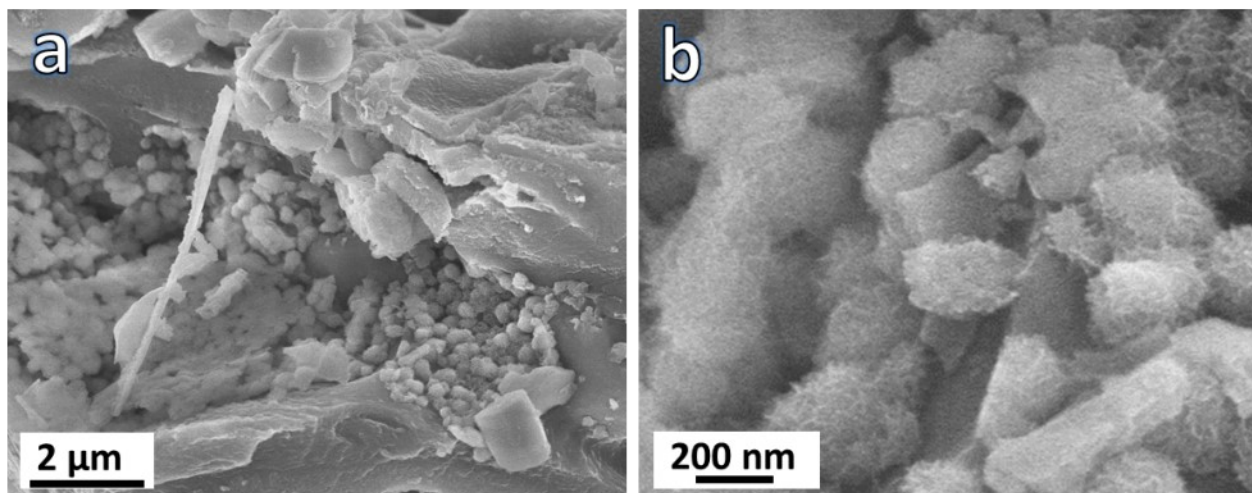

**Figure S3.** SEM images of NiC at different magnifications.

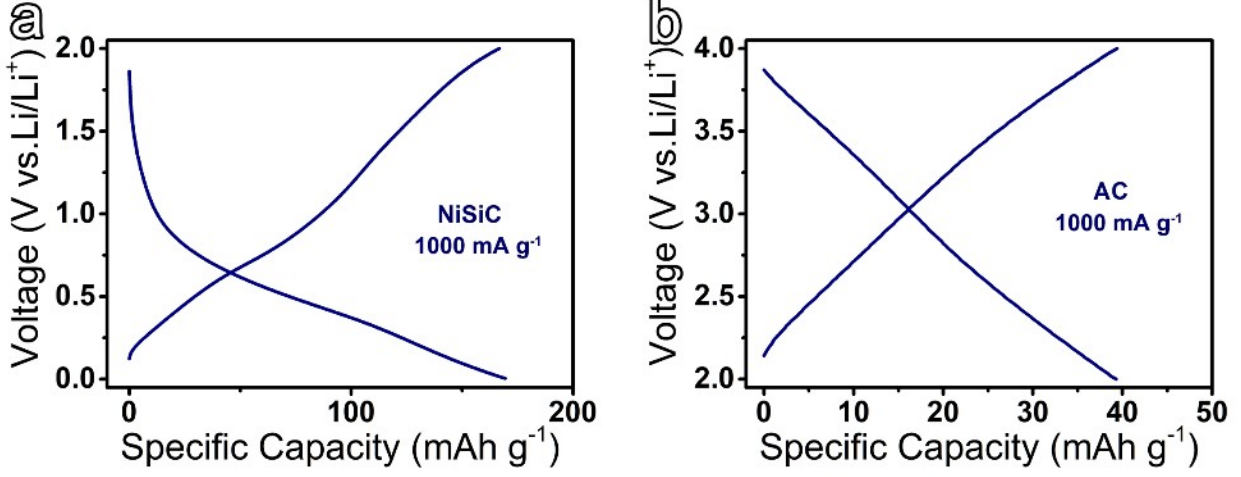

**Figure S4.** CD curves of (a) NiSiC and (b) AC electrodes in the half-cells at 1000 mA g<sup>-1</sup>.

## REFERENCES for Supporting Information

- (1) Fu, Y.; Jin, Y.; Ma, J.; Liu, J.; Wang, Z.; Wang, B.; Gong, X. Lithium-ion transfer strengthened by graphite tailings and coking coal for high-rate performance anode. *Chem. Eng. J.* **2022**, *442*, 136184.
- (2) Guo, S.; Koketsu, T.; Hu, Z.; Zhou, J.; Kuo, C.-Y.; Lin, H.-J.; Chen, C.-T.; Strasser, P.; Sui, L.; Xie, Y.; Ma, J. Mo-Incorporated Magnetite Fe<sub>3</sub>O<sub>4</sub> Featuring Cationic Vacancies Enabling Fast Lithium Intercalation for Batteries. *Small.* **2022**, *18*, 2203835.
- (3) Tang, B.; Zhou, J.; Fang, G.; Liu, F.; Zhu, C.; Wang, C.; Pan, A.; Liang, S. Engineering the interplanar spacing of ammonium vanadates as a high-performance aqueous zinc-ion battery cathode. *J. Mater. Chem. A.* **2019**, *7*, 940-945.
- (4) Fleischmann, S.; Mitchell, J.B.; Wang, R.; Zhan, C.; Jiang, D.-e.; Presser, V.; Augustyn, V. Pseudocapacitance: From Fundamental Understanding to High Power Energy Storage Materials. *Chem. Rev.* **2020**, *120*, 6738-6782.
